# Supplementary material
Source: PubMed Central journal article supplement (PMC9923726)
Supplement: NIHMS1500243-supplement-1.pdf [file NIHMS1500243-supplement-1.pdf]

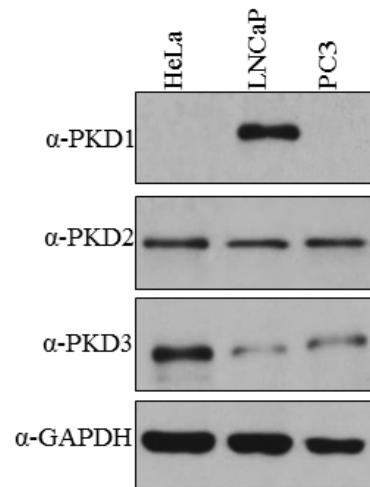

**Supplementary Figure S1.** HeLa, PC3 and LNCaP cells were grown; cell extracts were prepared and subjected to Western blotting using designated antibodies. GAPDH served as loading control.
