# Supplementary material
Source: PubMed Central journal article supplement (PMC9923726)
Supplement: NIHMS1500243-supplement-2.pdf [file NIHMS1500243-supplement-2.pdf]

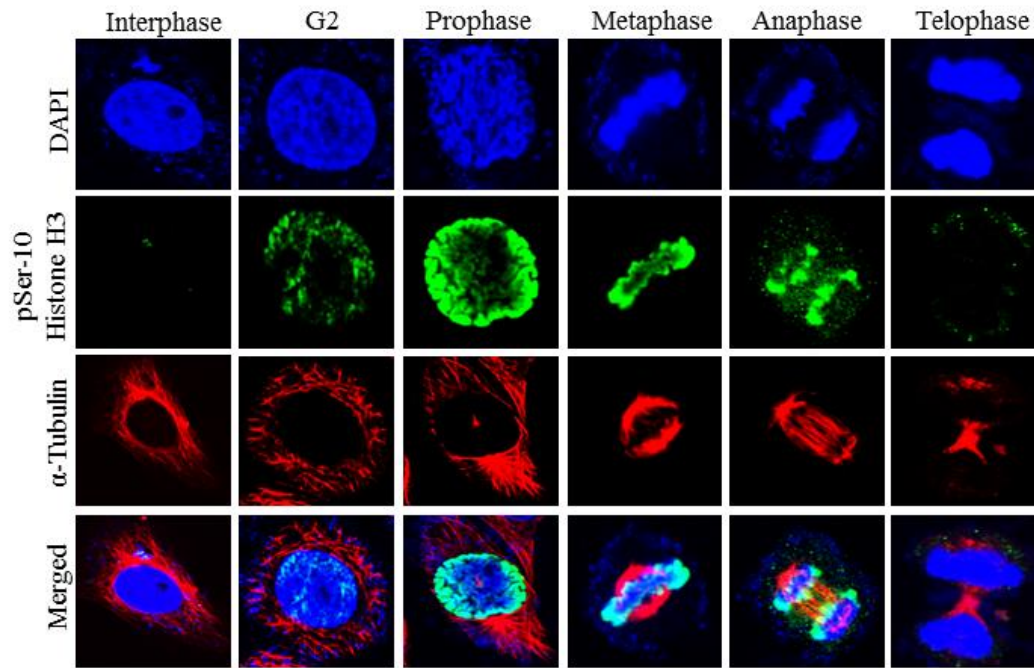

**Supplementary Figure S2.** Immunofluorescence (IF) staining of HeLa cells showing different cell cycle phases. The stages of cell cycle were determined by nuclear morphology (DAPI) as well as expression of phospho-histone H3<sup>Ser10</sup> (green).
