# Supplementary material
Source: PubMed Central journal article supplement (PMC9923726)
Supplement: NIHMS1500243-supplement-3.pdf [file NIHMS1500243-supplement-3.pdf]

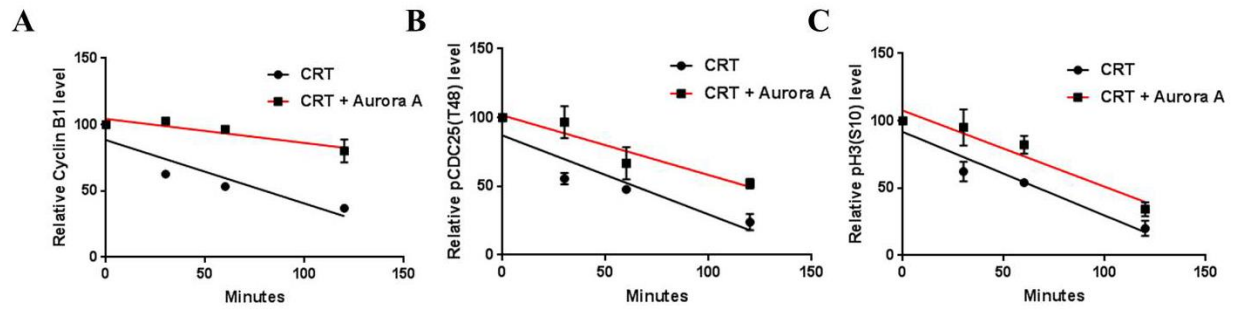

**Supplementary Figure S3.** Densitometric scanning of expression levels of Cyclin B1, phospho-CDC25<sup>T48</sup> and phospho-Histone H3<sup>S10</sup> from the immunoblot of Fig. 5E. The half-lives of these proteins were calculated as described in Materials and Methods.
