# Supplementary material
Source: PubMed Central journal article supplement (PMC9923726)
Supplement: NIHMS1500243-supplement-4.pdf [file NIHMS1500243-supplement-4.pdf]

**A**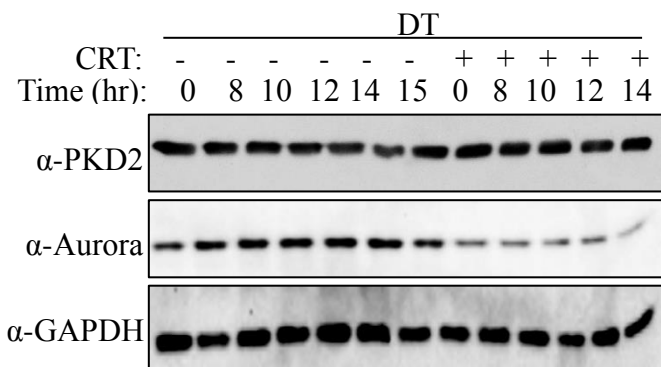**B**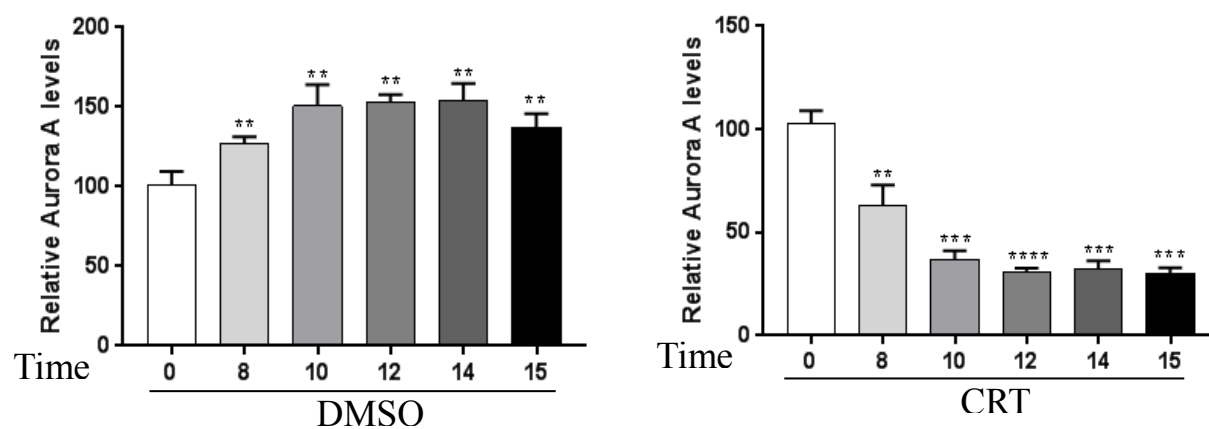

**Supplementary Figure S4.** **A** Western blot analysis showing downregulation of Aurora A upon treatment of cells released from a double thymidine (DT) arrest with CRT0066101 (CRT). **B** Quantification of Aurora A protein levels by densitometry scanning. The graphs show average of three independent experiments with error bars representing SEM ( \*\*  $p < 0.01$ , \*\*\*\*  $p < 0.0001$ ).
