# Supplementary material
Source: PubMed Central journal article supplement (PMC9923726)
Supplement: NIHMS1500243-supplement-5.pdf [file NIHMS1500243-supplement-5.pdf]

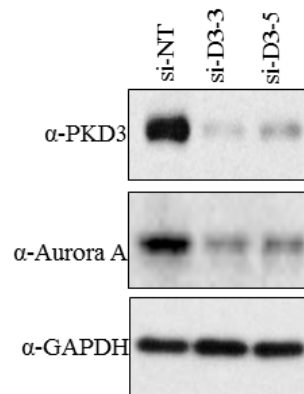

**Supplementary Figure S5.** HeLa cells were transfected with control non-targeting siRNA (siNT) and two PKD3-specific siRNAs (siPKD3-3 and siPKD3-5), incubated for 48 hr and the cell extracts from the samples were subjected to Western blotting using designated antibodies. GAPDH was used as a loading control.
