# Supplementary material
Source: PubMed Central journal article supplement (PMC9923726)
Supplement: NIHMS1500243-supplement-6.pdf [file NIHMS1500243-supplement-6.pdf]

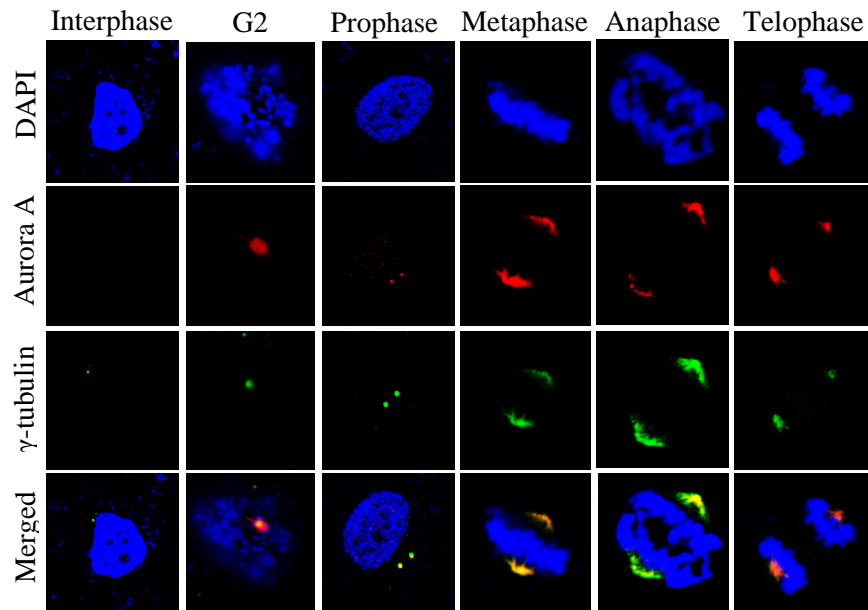

**Supplementary Figure S6:** HeLa cells were grown in poly D-lysine coated coverslip stained with antibodies against Aurora A (red) and  $\gamma$ -tubulin (green) and subjected them to IF staining as described in Materials and Methods. DAPI was used to stain the nucleus.
