# Supplementary material
Source: PubMed Central journal article supplement (PMC9923726)
Supplement: NIHMS1500243-supplement-7.pdf [file NIHMS1500243-supplement-7.pdf]

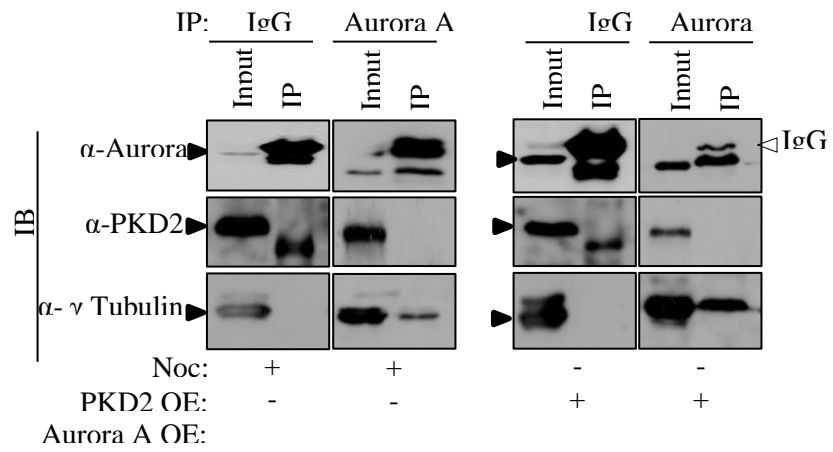

**Supplementary Figure S7.** Co-immunoprecipitation assay was carried out to assess physical interaction between PKD2, Aurora A and  $\gamma$ -tubulin. PKD2 and Aurora A were overexpressed (OE) and co-IP was also performed.
