# Supplementary material
Source: PubMed Central journal article supplement (PMC9923726)
Supplement: NIHMS1500243-supplement-8.pdf [file NIHMS1500243-supplement-8.pdf]

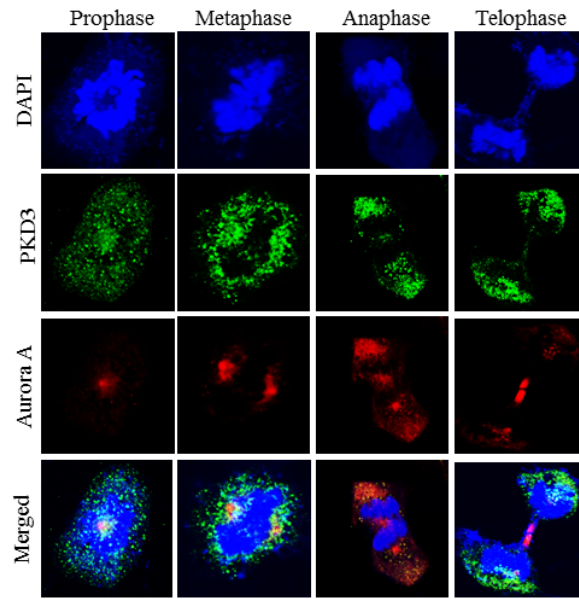

**Supplementary Figure S8.** HeLa cells were grown in poly D-lysine coated coverslip, stained with antibodies against PKD3 and Aurora A and subjected them to IF staining as described in Materials and Methods. DAPI was used to stain the nucleus.
